# Supplementary material for: Fabrication of stable Ni–Al4Ni3–Al2O3 superhydrophobic surface on aluminum substrate for self-cleaning, anti-corrosive and catalytic performance
Source: Springer Nature journal article supplement (doi:10.1007/s10853-017-1569-5), 2017-09-18
Supplement: MOESM1 [file 15069138]

**Fabrication of stable Ni-Al4Ni3-Al2O3 superhydrophobic surface on aluminum substrate for self-cleaning, anti-corrosive and catalytic performance**

Jingyan Li, Shixiang Lu*, Wenguo Xu*, Ge He, Tianlong Yu, Yuanyuan Cheng, Bei Wu

*School of Chemistry and Chemical Engineering, Beijing Institute of Technology, Beijing 100081, P.R. China*

——————————————————

* Corresponding author, E-mail: [shixianglu@bit.edu.cn](mailto:shixianglu@bit.edu.cn) (Shixiang Lu); [xuwg60@bit.edu.cn](mailto:xuwg60@bit.edu.cn) (Wenguo Xu)

**Fig. S1** WCAs of the as-prepared surfaces for different treating time in 2 mol·L-1 NaOH solution while immersed in a mixture of 2 mL 0.05 mol·L-1 NiCl2 solution and 0.78 mL concentrated hydrochloric acid solution at 80 ºC for 30 min, followed by annealing at 200 ºC for 1 h.

**Fig. S2** WCAs of the as-prepared surfaces at different (a) concentration of NiCl2 solution; (b) volume of HCl solution; (c) immersion period and (d) immersion temperature while etching period in 2 mol·L-1 NaOH solution was 6 min, followed by annealing at 200 ºC for 1 h.

**Fig. S3** WCAs of the as-prepared surfaces at different (a) annealing period and (b) annealing temperature, while etching period in 2 mol·L-1 NaOH solution was 6 min and immersed in a mixture of 2 mL mol·L-1 NiCl2 and 0.78 mL concentrated hydrochloric acid solution at 80 ºC for 30 min.
